# Supplementary material for: A challenge for theranostics: is the optimal particle for therapy also optimal for diagnostics?
Source: Royal Society of Chemistry journal article supplement (doi:10.1039/c5nr03119b), 2015-01-01
Supplement: c5nr03119b1.pdf [file c5nr03119b1.pdf]

## Supporting Information

|           | 20nm | 50nm | 80nm  | 120nm |
|-----------|------|------|-------|-------|
| Bare GNPs | 23.1 | 66.5 | 83.7  | 119.1 |
| C225-GNPs | 31.8 | 91.7 | 112.0 | 146.3 |

Table S11: Hydrodynamic diameter of GNPs before and after conjugation, as measured by DLS.

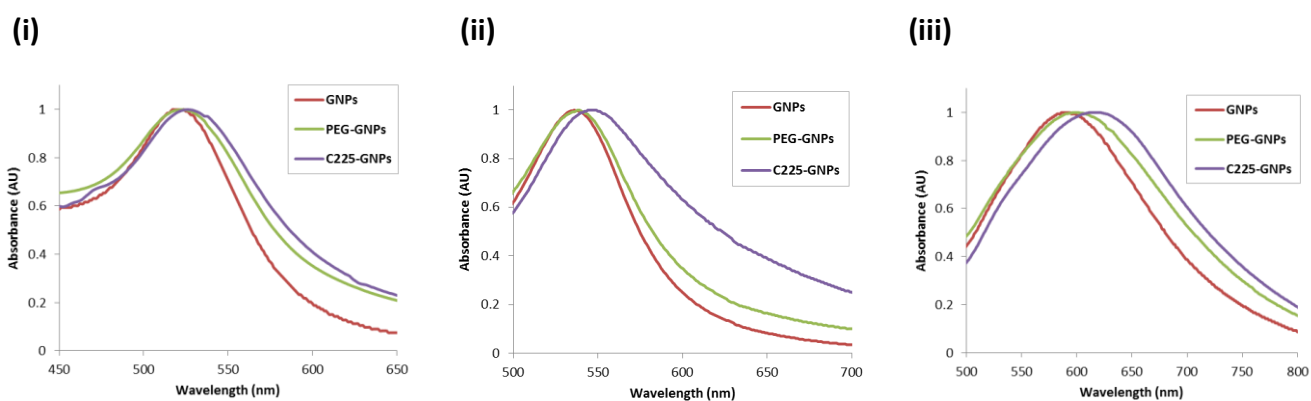

Figure S11: UV-Vis of bare GNPs, PEG-coated GNPs and final C225-GNPs, for: (i) 20nm GNPs; (ii) 50nm GNPs; and (iii) 120nm GNPs. The UV-Vis Plasmon resonance shift and expansion indicate the different coating layers.
